# Supplementary material for: Population Structure and Antimicrobial Resistance Profiles of Streptococcus suis Serotype 2 Sequence Type 25 Strains
Source: PubMed Central journal article supplement (PMC4783015; doi:10.1371/journal.pone.0150908), 2016-03-08
Supplement: pone.0150908.s001.pdf [file pone.0150908.s001.pdf]

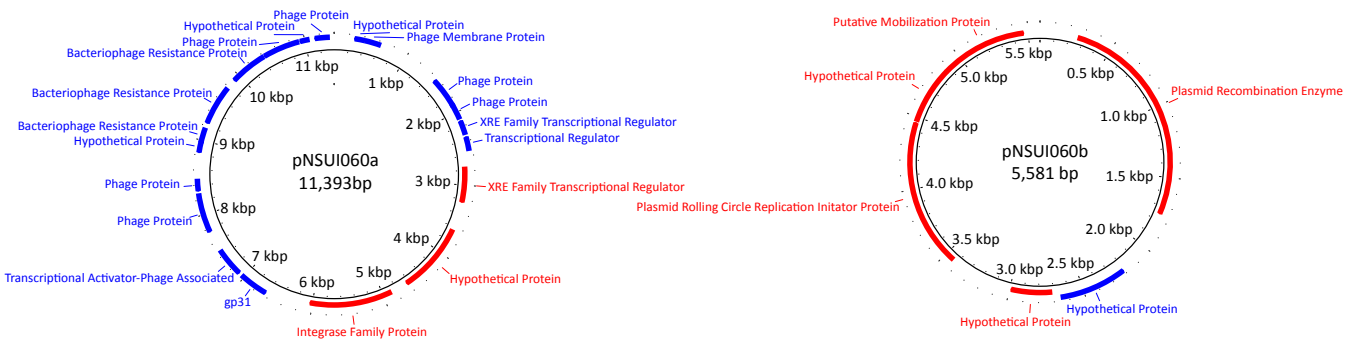

**S1 Fig. Representation of genes present in NSUI060 plasmids.** CDSs depicted in red are on the forward coding strand, CDSs depicted in blue are on the reverse coding strand.
